# Supplementary material for: Biodegradation of graphdiyne oxide in classically activated (M1) macrophages modulates cytokine production
Source: Royal Society of Chemistry journal article supplement (doi:10.1039/d1nr02473f), 2021-01-01
Supplement: d1nr02473f1.pdf [file d1nr02473f1.pdf]

## Supporting Information

### **Biodegradation of graphdiyne oxide (GDYO) in classically activated (M1) macrophages modulates cytokine production**

Guotao Peng<sup>a</sup>, Tianbo Duan<sup>b</sup>, Mengyu Guo<sup>c</sup>, Yurui Xue<sup>d</sup>,

Chunying Chen<sup>c</sup>, Yuliang Li<sup>d</sup>, Klaus Leifer<sup>b</sup> & Bengt Fadeel<sup>a</sup>

*<sup>a</sup>Nanosafety & Nanomedicine Laboratory (NNL), Institute of Environmental Medicine, Karolinska Institutet, Stockholm, Sweden;*

*<sup>b</sup>Department of Engineering Sciences, Uppsala University, Uppsala, Sweden;*

*<sup>c</sup>CAS Key Laboratory for Biomedical Effects of Nanomaterials and Nanosafety, CAS Center for Excellence in Nanoscience, National Center for Nanoscience and Technology (NCNST), Beijing, China;*

*<sup>d</sup>CAS Key Laboratory of Organic Solids, Beijing National Laboratory for Molecular Sciences, CAS Research/Education Center for Excellence in Molecular Sciences, Institute of Chemistry, Chinese Academy of Sciences, Beijing, China.*

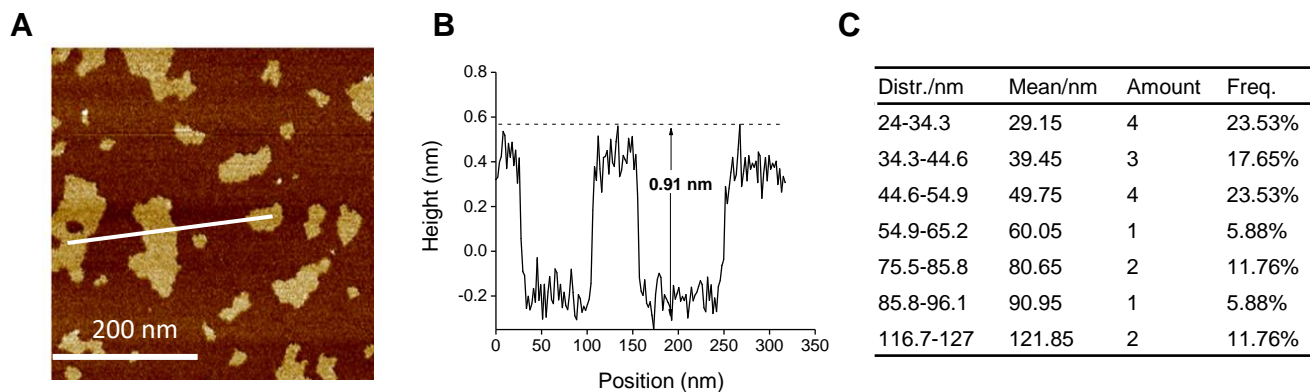

**Figure S1** Physicochemical characterization of GDYO. (A) AFM analysis of GDYO. Scale bar: 200 nm. (B) Thickness analysis from the cross section in panel (A). (C) Lateral size distribution. The size was measured with Nano Measurer software v. 1.25 and the thickness of GDYO was processed with Bruker NanoScope Analysis software v. 1.80.

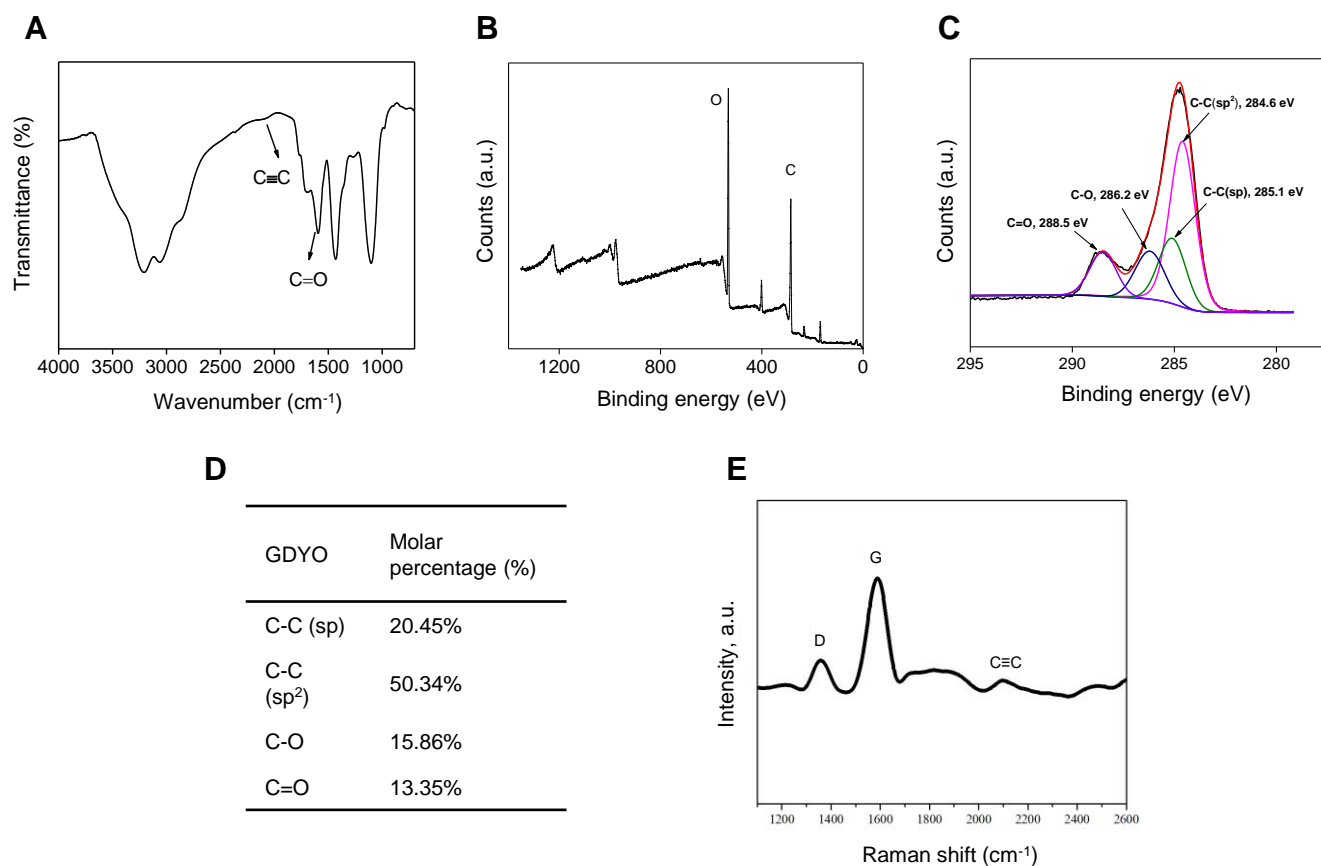

**Figure S2** Physicochemical characterization of GDYO. (A) The FTIR spectrum of GDYO shows a peak for the C=O stretching vibration at  $1,596\text{ cm}^{-1}$  and a peak for the C $\equiv$ C stretching vibration at  $2090\text{ cm}^{-1}$ . (B) The XPS survey scan of GDYO shows the peaks corresponding to C 1s and O 1s. (C) XPS scan of C 1s peaks. (D) Molar percentages of C-C  $\text{sp}^2$ , C-C  $\text{sp}$ , C-O, and C=O present in GDYO. (E) Raman spectrum of GDYO shows the characteristic D band ( $1360\text{ cm}^{-1}$ ), G band ( $1582\text{ cm}^{-1}$ ), and C $\equiv$ C band ( $2100\text{ cm}^{-1}$ ).

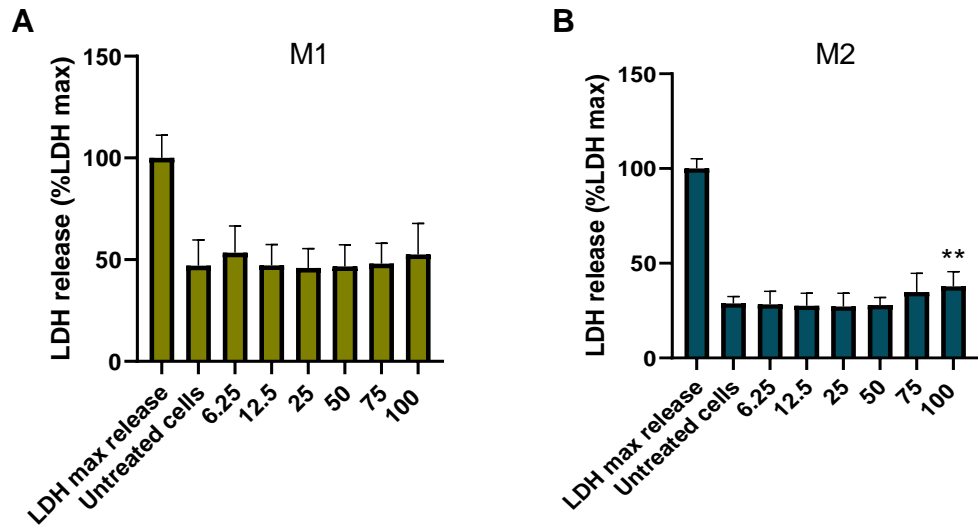

**Figure S3** Cell viability of M1 (A) and M2 (B) macrophages following GDYO exposure as determined by LDH release. Results are presented as mean values  $\pm$  S.D. of results obtained from three independent human donors. \*\*  $p < 0.01$ . Student's t-test.

**Table S1** The intensity of D ( $I_D$ ) and G peak ( $I_G$ ) of the Raman signals of GDYO in M1 and M2 macrophages. The intensities at 48 h and 72 h were normalized to the values obtained at 24 h. Results are presented as the mean value  $\pm$  S.D. of 50 representative spectra.

| Treatment | Intensity | 48 h/24 h         | 72 h/24 h         |
|-----------|-----------|-------------------|-------------------|
| M1        | $I_D$     | $21.2 \pm 2.4 \%$ | $6.4 \pm 1.2 \%$  |
|           | $I_G$     | $17.8 \pm 2.1 \%$ | $5.8 \pm 1.1 \%$  |
| M2        | $I_D$     | $96.8 \pm 2.1 \%$ | $90.6 \pm 5.2 \%$ |
|           | $I_G$     | $97.3 \pm 2.0 \%$ | $93.4 \pm 3.6 \%$ |

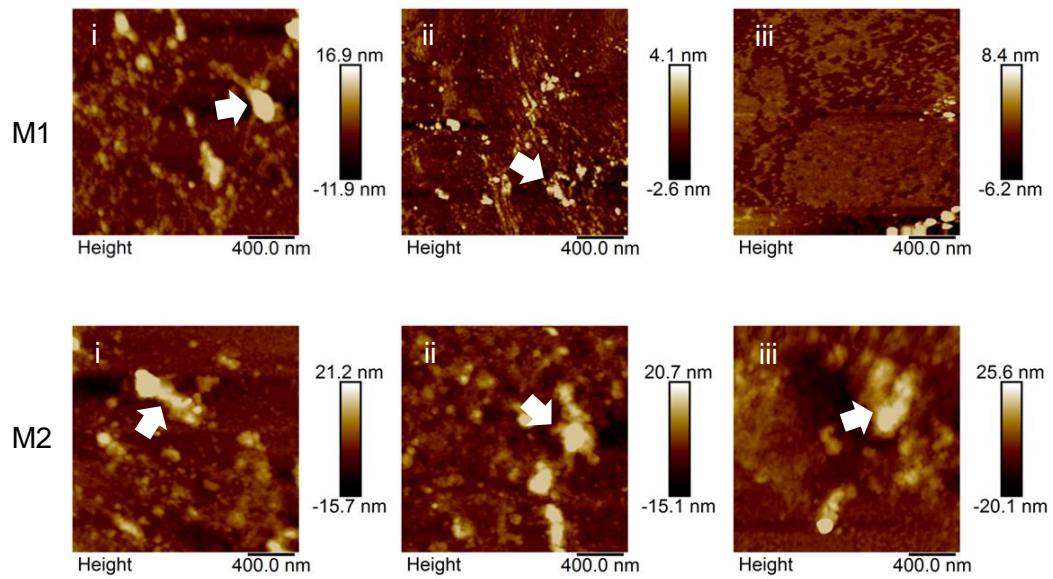

**Figure S4** Biodegradation of GDYO in primary human M1 macrophages. Representative AFM images of M1 and M2 macrophages exposed to GDYO for 24 h (i), 48 h (ii) and 72 h (iii). For an overview of the entire scanning area, refer to the AFM images shown in Figure 4c.

**Table S2** The lateral size and thickness of GDYO in M1 and M2 macrophages as determined by AFM analysis. The results are presented as mean values  $\pm$  S.D. of 50 flakes.

| Treatment |                   | 24 h             | 48 h             | 72 h            |
|-----------|-------------------|------------------|------------------|-----------------|
| M1        | Lateral size (nm) | 44.0 $\pm$ 14.9  | 21.3 $\pm$ 9.4   | 10.7 $\pm$ 5.1  |
|           | Thickness (nm)    | 12.88 $\pm$ 5.93 | 7.58 $\pm$ 4.38  | 2.74 $\pm$ 1.66 |
| M2        | Lateral size (nm) | 42.2 $\pm$ 10.6  | 46.6 $\pm$ 9.7   | 48.6 $\pm$ 9.6  |
|           | Thickness (nm)    | 10.64 $\pm$ 4.52 | 11.42 $\pm$ 3.65 | 9.84 $\pm$ 5.64 |

**Table S3** The lateral size and thickness of GDYO following incubation with the peroxynitrite donor SIN-1 for 5 days as determined by AFM analysis. The results are presented as mean values  $\pm$  S.D. of 50 flakes.

| Treatment    |                   | 5 days          |
|--------------|-------------------|-----------------|
| GDYO         | Lateral size (nm) | 46.0 $\pm$ 21.5 |
|              | Thickness (nm)    | 6.14 $\pm$ 3.23 |
| GDYO + SIN-1 | Lateral size (nm) | 25.7 $\pm$ 16.6 |
|              | Thickness (nm)    | 4.33 $\pm$ 2.18 |
